# Supplementary material for: Duplicate gene evolution, homoeologous recombination, and transcriptome characterization in allopolyploid cotton
Source: PubMed Central journal article supplement (PMC3427041; doi:10.1186/1471-2164-13-302), 2012-07-06

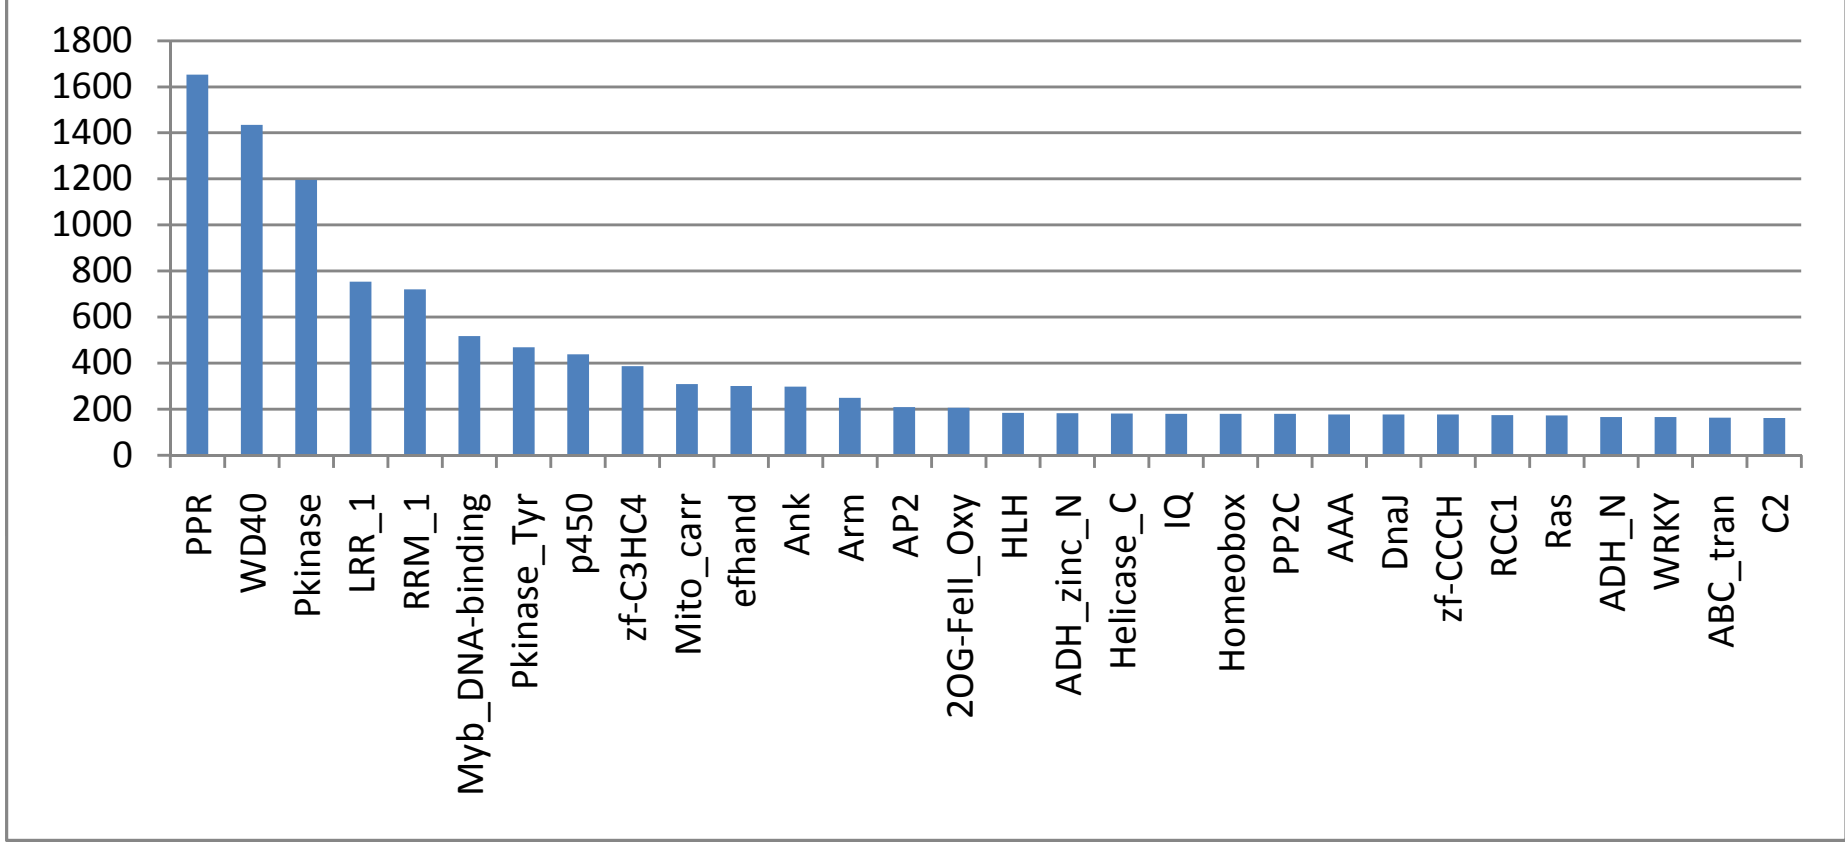

Supplement: 1471-2164-13-302-S1.pdf [file 1471-2164-13-302-S1.pdf]
