# Supplementary material for: Duplicate gene evolution, homoeologous recombination, and transcriptome characterization in allopolyploid cotton
Source: PubMed Central journal article supplement (PMC3427041; doi:10.1186/1471-2164-13-302), 2012-07-06
Supplement: 1471-2164-13-302-S4.pdf [file 1471-2164-13-302-S4.pdf]

A table summarizing the findings of the validation study conducted by comparing publically available sequences with the Cotton46a EST assembly

| gene name                       | genome | GenBank acc. | Cotton46a contig | blast evalue | mismatches | sites evaluated | %diff      |
|---------------------------------|--------|--------------|------------------|--------------|------------|-----------------|------------|
| B5                              | A      | AY116167     | Contig_21797_A   | 0            | 2          | 489             | 0.00408998 |
| B5                              | At     | AY116169     | Contig_21797_At  | 0            | 3          | 523             | 0.00573614 |
| B5                              | D      | AY116168     | Contig_54007_D   | 0            | 1          | 523             | 0.00191205 |
| B7                              | A      | AY117055     | Contig_51818_A   | 0            | 1          | 615             | 0.00162602 |
| B7                              | Dt     | AY117058     | Contig_51818_Dt  | 0            | 0          | 615             | 0          |
| B7                              | At     | AY117057     | Contig_51818_At  | 0            | 1          | 615             | 0.00162602 |
| B7                              | D      | AY117056     | Contig_51818_D   | 0            | 0          | 615             | 0          |
| B8                              | A      | AY115496     | Contig_22616_A   | 3.00E-62     | 0          | 120             | 0          |
| B8                              | Dt     | AY115499     | Contig_22616_Dt  | 3.00E-53     | 1          | 109             | 0.00917431 |
| B8                              | D      | AY115497     | Contig_22616_D   | 3.00E-62     | 0          | 120             | 0          |
| B8                              | At     | AY115498     | Contig_22616_At  | 3.00E-62     | 0          | 120             | 0          |
| C3                              | A      | AY117061     | Contig_27205_A   | 1.00E-157    | 1          | 284             | 0.00352113 |
| CesA1                           | A      | EU626444     | Contig_18567_A   | 0            | 1          | 533             | 0.00187617 |
| CesA1                           | Dt     | AY632360     | Contig_18567_Dt  | 0            | 1          | 533             | 0.00187617 |
| CesA1                           | D      | EU626442     | Contig_18567_D   | 0            | 0          | 533             | 0          |
| CesA1                           | At     | AY632359     | Contig_18567_At  | 0            | 1          | 533             | 0.00187617 |
| CesA2                           | A      | AY138240     | Contig_40547_A   | 1.00E-123    | 2          | 256             | 0.0078125  |
| CesA2                           | At     | AY138242     | Contig_40547_At  | 0            | 7          | 518             | 0.01351351 |
| CesA2                           | D      | AY138241     | Contig_40547_D   | 0            | 0          | 518             | 0          |
| E11                             | A      | AF517656     | Contig_8458_A    | 6.00E-65     | 5          | 144             | 0.03472222 |
| E11                             | Dt     | AF517659     | Contig_49048_Dt  | 4.00E-60     | 1          | 120             | 0.00833333 |
| E11                             | D      | AF517657     | Contig_49048_D   | 7.00E-77     | 0          | 144             | 0          |
| F12                             | A      | AY116157     | Contig_4987_A    | 1.00E-137    | 0          | 246             | 0          |
| F12                             | Dt     | AY116160     | Contig_4987_Dt   | 8.00E-136    | 1          | 246             | 0.00406504 |
| F12                             | D      | AY116158     | Contig_4987_D    | 1.00E-137    | 0          | 246             | 0          |
| F12                             | At     | AY116159     | Contig_4987_At   | 2.00E-121    | 1          | 223             | 0.0044843  |
| F4                              | A      | AY117100     | Contig_34253_A   | 5.00E-113    | 0          | 205             | 0          |
| F4                              | Dt     | AY117103     | Contig_34253_Dt  | 1.00E-110    | 1          | 205             | 0.00487805 |
| F4                              | D      | AY117101     | Contig_34253_D   | 1.00E-110    | 1          | 205             | 0.00487805 |
| F4                              | At     | AY117102     | Contig_34253_At  | 5.00E-113    | 0          | 205             | 0          |
| Myb1                            | A      | AY115504     | Contig_48656_A   | 0            | 2          | 585             | 0.0034188  |
| Myb1                            | D      | AY115503     | Contig_31301_D   | 0            | 2          | 335             | 0.00597015 |
| A1550                           | A      | AF201890     | Contig_25379_A   | 6.00E-134    | 0          | 241             | 0          |
| A1550                           | At     | AF201891     | Contig_25379_At  | 1.00E-131    | 1          | 241             | 0.00414938 |
| A1550                           | D      | AF201892     | Contig_37026_D   | 2.00E-133    | 0          | 240             | 0          |
| A1623                           | A      | AF139474     | Contig_41536_A   | 1.00E-59     | 1          | 120             | 0.00833333 |
| A1623                           | Dt     | AF139477     | Contig_41536_Dt  | 6.00E-62     | 0          | 120             | 0          |
| A1623                           | At     | AF139475     | Contig_41536_At  | 4.00E-75     | 1          | 154             | 0.00649351 |
| A1623                           | D      | AF139476     | Contig_41536_D   | 6.00E-62     | 0          | 120             | 0          |
| A1751                           | A      | AF139437     | Contig_49337_A   | 2.00E-157    | 1          | 284             | 0.00352113 |
| A1751                           | At     | AF139438     | Contig_49337_At  | 0            | 8          | 807             | 0.00991326 |
| A1751                           | D      | AF139439     | Contig_49337_D   | 0            | 5          | 456             | 0.01096491 |
| AdhA                            | A      | EF457752     | Contig_36154_A   | 0            | 1          | 414             | 0.00241546 |
| AdhA                            | Dt     | EF457754     | Contig_36154_Dt  | 0            | 0          | 414             | 0          |
| AdhA                            | At     | EF457753     | Contig_36154_At  | 0            | 1          | 414             | 0.00241546 |
| AdhA                            | D      | EF457751     | Contig_36154_D   | 0            | 6          | 414             | 0.01449275 |
| CelA1                           | D      | AF139442     | Contig_23048_D   | 2.00E-105    | 0          | 193             | 0          |
| G1134                           | Dt     | AF139430     | Contig_4412_Dt   | 5.00E-129    | 0          | 232             | 0          |
| G1134                           | At     | AF139428     | Contig_4412_At   | 8.00E-125    | 2          | 232             | 0.00862069 |
| G1134                           | D      | AF139429     | Contig_4412_D    | 5.00E-129    | 0          | 232             | 0          |
| CesABAC_02                      | At     | AY632359     | Contig_32982_At  | 0            | 2          | 657             | 0.00304414 |
| CesABAC_02                      | D      | EU626442     | Contig_32982_D   | 6.00E-70     | 0          | 134             | 0          |
| CesABAC_03                      | At     | AY632359     | Contig_48840_At  | 0            | 3          | 612             | 0.00490196 |
| CesABAC_03                      | D      | EU626442     | Contig_48840_D   | 2.00E-117    | 0          | 213             | 0          |
| CesABAC_07                      | D      | EU626442     | Contig_51983_D   | 9.00E-120    | 0          | 218             | 0          |
| CesABAC_10                      | Dt     | AY632360     | Contig_43453_Dt  | 0            | 0          | 519             | 0          |
| CesABAC_10                      | At     | AY632359     | Contig_43453_At  | 0            | 1          | 424             | 0.00235849 |
| CesABAC_11                      | Dt     | AY632360     | Contig_4532_Dt   | 0            | 6          | 739             | 0.00811908 |
| CesABAC_11                      | At     | AY632359     | Contig_4532_At   | 0            | 5          | 489             | 0.01022495 |
| integralmembrane oxidoreductase | At     | EF457753     | Contig_6436_At   | 6.00E-115    | 1          | 212             | 0.00471698 |
| oxidoreductase                  | D      | EF457751     | Contig_2545_D    | 0            | 0          | 448             | 0          |
| protein disulfide               | Dt     | EF457754     | Contig_39884_Dt  | 5.00E-164    | 0          | 292             | 0          |
| protein disulfide               | At     | EF457753     | Contig_39884_At  | 5.00E-164    | 0          | 292             | 0          |
| protein disulfide               | D      | EF457751     | Contig_39884_D   | 5.00E-164    | 0          | 292             | 0          |
| PS2                             | Dt     | EF457754     | Contig_39637_Dt  | 2.00E-139    | 0          | 250             | 0          |
| PS2                             | D      | EF457751     | Contig_39637_D   | 2.00E-139    | 0          | 250             | 0          |
| PS2                             | At     | EF457753     | Contig_39637_At  | 2.00E-96     | 0          | 178             | 0          |
